# Supplementary material for: Molecular cytogenetic characterization of a new wheat-Thinopyrum intermedium homoeologous group-6 chromosome disomic substitution line with resistance to leaf rust and stripe rust
Source: Front Plant Sci. 2022 Sep 6;13:1006281. doi: 10.3389/fpls.2022.1006281 (PMC9486089; doi:10.3389/fpls.2022.1006281)
Supplement: Supplementary file 2 [file Table_1.xlsx]

## Sheet: Sheet_1
Supplementary Table 1. Statistical analysis of the percentages of missing SNP loci in CH51, CS-N6BT6D, CS-N6AT6D, and CS-N6DT6B.
Chromosome	No. of markers	No. of missing markers in CH51	Percentage of missing markers in CH51	No.of missing markers in CS-N6BT6D	Percentage of missing markers in CS-N6BT6D	No.of missing markers in CS-N6AT6D	Percentage of missing markers in CS-N6AT6D	No.of missing markers in CS-N6DT6B	Percentage of missing markers in CS-N6DT6B
1A	2625	44	0.0167619	5	0.00190476	20	0.00761905	10	0.00380952
1B	2595	39	0.0150289	14	0.00539499	18	0.00693642	10	0.00385356
1D	2138	31	0.0144995	16	0.00748363	14	0.00654818	11	0.005145
2A	2622	37	0.0141114	21	0.00800915	28	0.0106789	18	0.00686499
2B	2600	114	0.0438462	20	0.00769231	19	0.00730769	16	0.00615385
2D	2247	74	0.0329328	9	0.00400534	12	0.00534045	12	0.00534045
3A	2174	44	0.0202392	11	0.0050598	7	0.00321987	12	0.00551978
3B	2595	48	0.0184971	15	0.00578035	24	0.00924855	19	0.00732177
3D	1693	93	0.0549321	6	0.003544	10	0.00590667	6	0.003544
4A	2592	23	0.00887346	10	0.00385802	7	0.00270062	10	0.00385802
4B	2556	22	0.0086072	17	0.00665102	16	0.00625978	62	0.0242567
4D	1420	17	0.0119718	14	0.00985915	21	0.0147887	19	0.0133803
5A	2611	31	0.0118728	20	0.0076599	17	0.00651092	11	0.00421295
5B	2586	43	0.016628	21	0.00812065	21	0.00812065	17	0.00657386
5D	1737	21	0.0120898	7	0.00402994	5	0.00287853	7	0.00402994
6A	2623	104	0.0396493	38	0.0144872	1779	0.678231	66	0.025162
6B	2547	1600	0.62819	1706	0.669808	33	0.0129564	75	0.0294464
6D	1728	47	0.0271991	127	0.0734954	118	0.068287	1322	0.765046
7A	2579	49	0.0189996	8	0.00310198	18	0.00697945	9	0.00348972
7B	2487	43	0.0172899	10	0.00402091	8	0.00321673	8	0.00321673
7D	2305	156	0.067679	6	0.00260304	6	0.00260304	9	0.00390456
Total	49060	2680	0.054627	2101	0.0428251	2201	0.0448634	1729	0.0352426
